# Supplementary material
Source: publisher figshare collection journal article supplement (https://acs.figshare.com/ndownloader/files/3940792)
Supplement: Supplementary file 1 [file 3940792]

## SUPPORTING INFORMATION

# A simple way to engineer metal-semiconductor interface for enhanced performance of perovskite organic lead iodide solar cells

Yuzhuan Xu,<sup>a</sup> Jiangjian Shi,<sup>a</sup> Songtao Lv,<sup>a</sup> Lifeng Zhu,<sup>a</sup> Juan Dong,<sup>b</sup> Huijue Wu,<sup>a</sup> Yin Xiao,<sup>b</sup>

Yanhong Luo,<sup>a</sup> Shirong Wang,<sup>b,c</sup> Dongmei Li,<sup>\*a</sup> Xianggao Li,<sup>\*b,c</sup> Qingbo Meng<sup>\*a,c</sup>

<sup>a</sup>Key Laboratory for Renewable Energy, Chinese Academy of Sciences, Beijing Key Laboratory for New Energy Materials and Devices, Institute of Physics, Chinese Academy of Sciences, Beijing, 100190, China.

<sup>b</sup>School of Chemical Engineering and Technology, Tianjin University, Tianjin 300072, China. <sup>c</sup>The Co-Innovation Center of Chemistry and Chemical Engineering of Tianjin, Tianjin 300072, China.

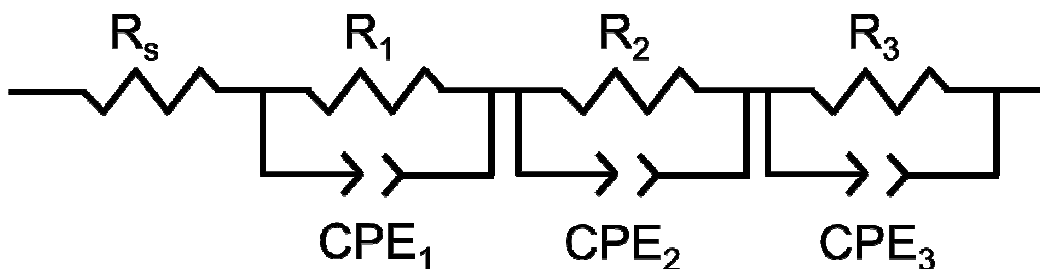

Figure S1. Equivalent circuit employed to fit the Nyquist plots of the device with thick TPB layer at the bias voltages from 500 mV to 800 mV.  $R_s$  is the series resistance of the device.  $R_1$  and  $C_1$  of  $CPE_1$  are the interface resistance and capacitance of the  $TiO_2/CH_3NH_3PbI_3$  interface which cause the low frequency feature.  $R_2$  and  $C_2$  of  $CPE_2$  are the interface

resistance and capacitance of one of the two back contact interfaces, the  $\text{CH}_3\text{NH}_3\text{PbI}_3/\text{TPB}$  interface or the  $\text{TPB}/\text{Au}$  interfaces, while  $R_3$  and  $C_3$  of  $\text{CPE}_3$  are the interface resistance and capacitance of the other interface.

**Table S1. The fitted charge transport resistance in the back contact of the device with thick TPB layer.**

|              | 500mV | 600mV | 700mV | 800mV | 900mV |
|--------------|-------|-------|-------|-------|-------|
| $R_2/\Omega$ | 31775 | 6021  | 3289  | 1188  | 1130  |
| $R_3/\Omega$ | 5676  | 4083  | 1317  | 968.7 | -     |

The  $R_2$  at the bias voltage of 900 mV was fitted without  $R_3\text{-CPE}_3$  unit since the oblate arc reverts to one arc.

**Note 1. Impedance Spectroscopy Model.**

With a thick TPB layer added, the spectra pattern in Figure 4c is composed by one oblate arc and a low frequency feature in the whole measured frequency range. This oblate arc can be subdivided into two arcs with different eccentricities at the bias voltages from 500 to 800mV. Therefore, we think it can be due to two new interfaces derived from the introduction of the thick TPB layer, which are the  $\text{CH}_3\text{NH}_3\text{PbI}_3/\text{TPB}$  and the  $\text{TPB}/\text{Au}$  interfaces, respectively.

Therefore, a new equivalent circuit in Figure S1 will be applied to fit the EIS spectra of the device with thick TPB. The fitting results are shown in Table S1. However, more work need to be done to figure out the one-to-one correspondence between the two interface resistances and the two interfaces. It is worth noting that when the bias voltage is 900 mV, the oblate arc reverts to one arc, which means that the two interfaces were coupled into inseparable one in high bias voltage. This phenomenon is difficult to interpret at the present stage and further investigation is in need.
